# Supplementary material for: Reference Genes for Real-Time PCR Quantification of Messenger RNAs and MicroRNAs in Mouse Model of Obesity
Source: PubMed Central journal article supplement (PMC3895018; doi:10.1371/journal.pone.0086033), 2014-01-17

Figure S1

Representative amplification and melt-curve profiles of Real-Time qPCR assays

Candidate reference genes for mRNA normalization

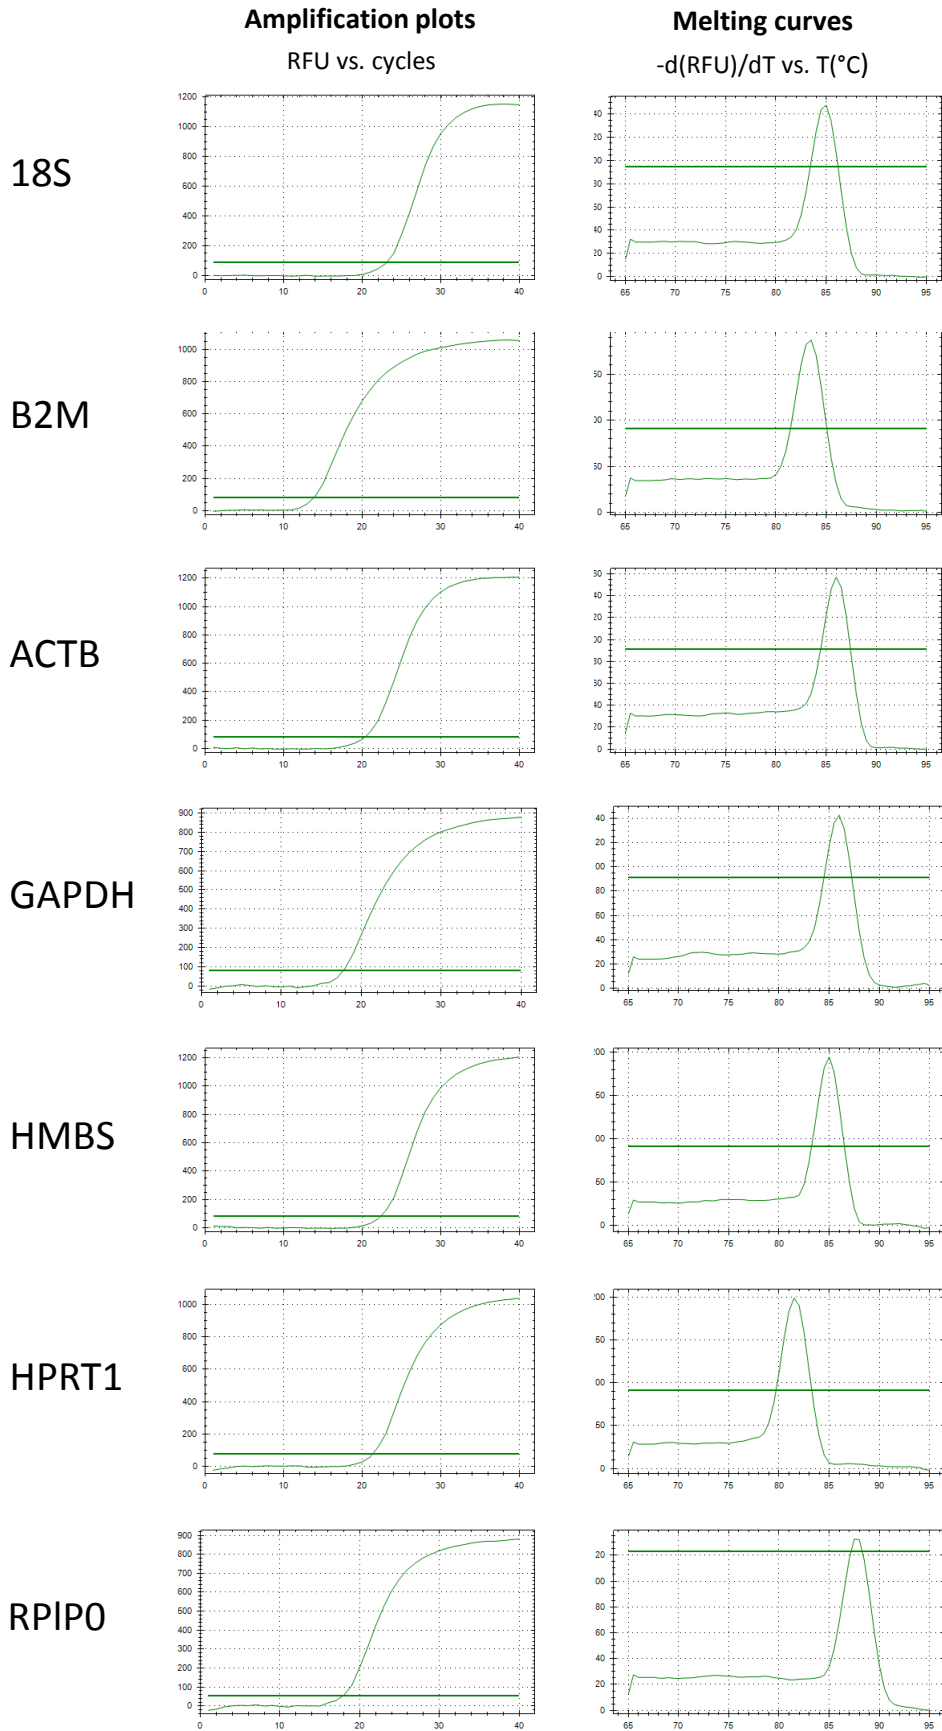

# Representative amplification and melt-curve profiles of Real-Time qPCR assays

Candidate reference genes for microRNA normalization

## Amplification plots

RFU vs. cycles

## Melting curves

$-d(\text{RFU})/dT$  vs.  $T(^{\circ}\text{C})$

miR-16

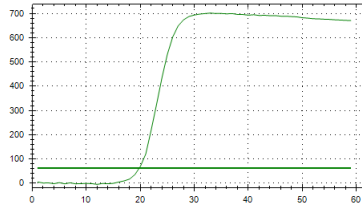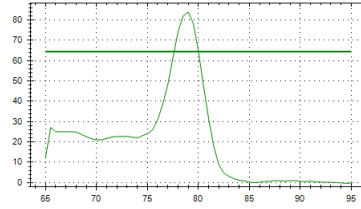

miR-19a

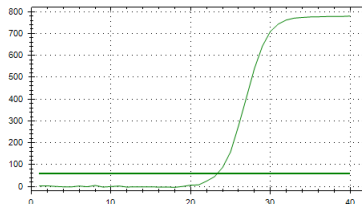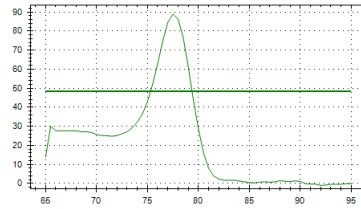

miR-122

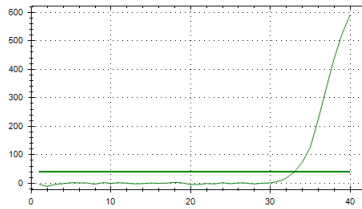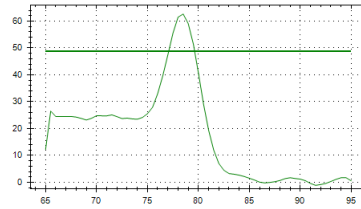

miR-142

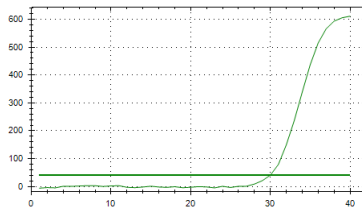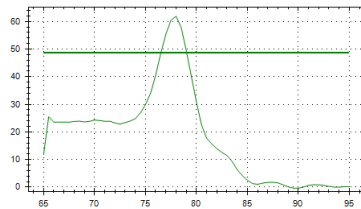

miR-143

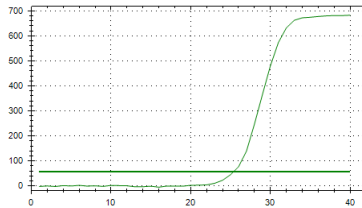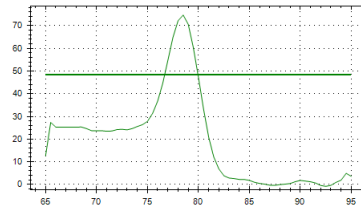

miR-186

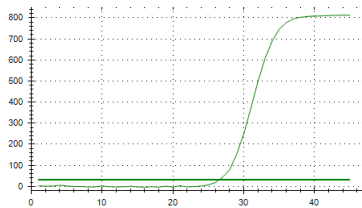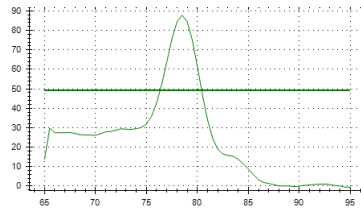

miR-200a

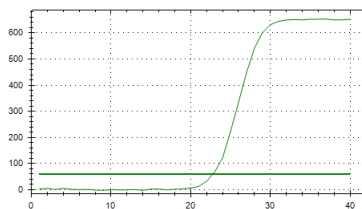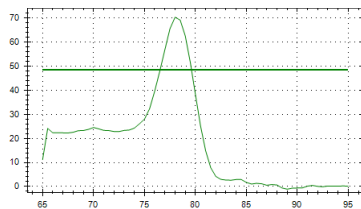

# Representative amplification and melt-curve profiles of Real-Time qPCR assays

Candidate reference genes for microRNA normalization

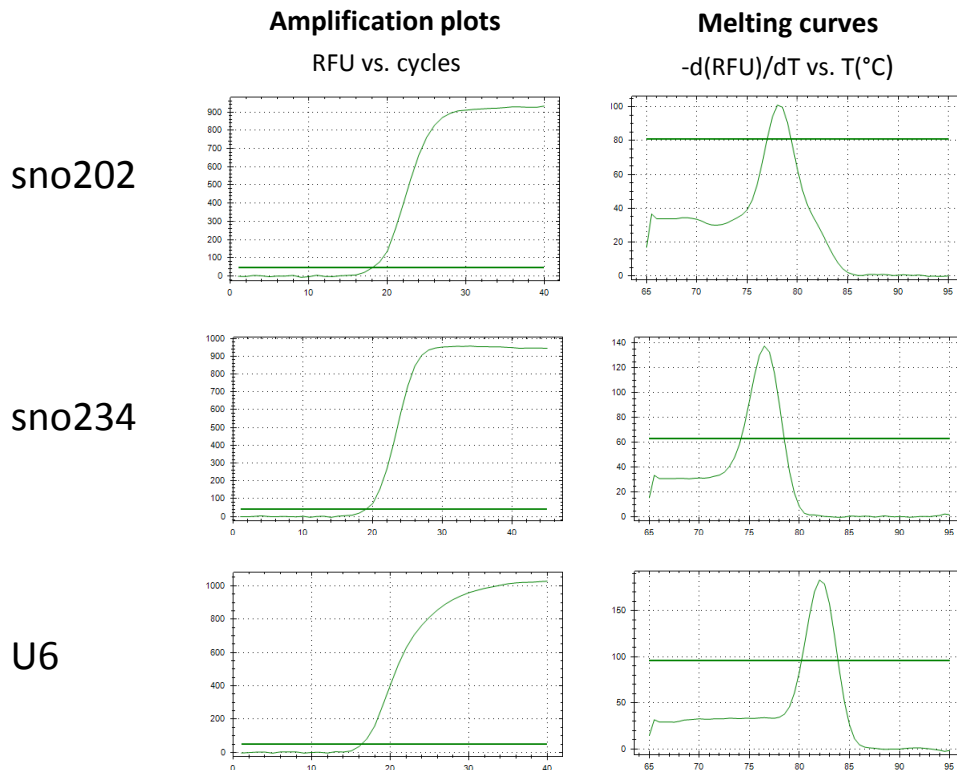

## Genes of interest

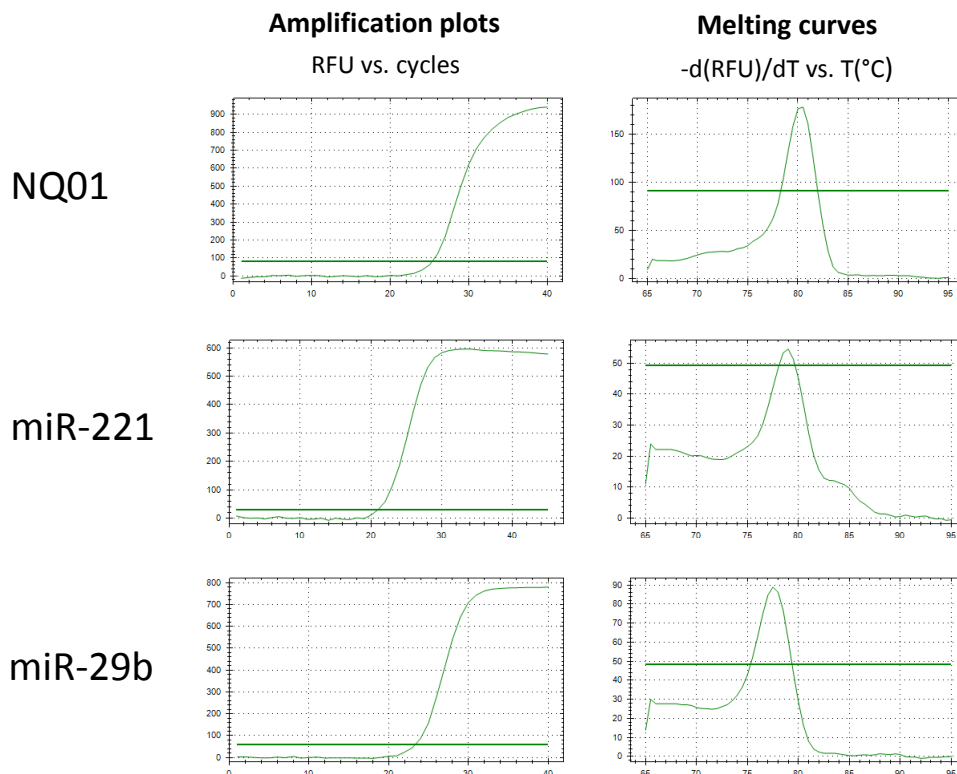

Supplement: pone.0086033.s001.pdf [file pone.0086033.s001.pdf]
