# Supplementary material for: Reference Genes for Real-Time PCR Quantification of Messenger RNAs and MicroRNAs in Mouse Model of Obesity
Source: PubMed Central journal article supplement (PMC3895018; doi:10.1371/journal.pone.0086033), 2014-01-17
Supplement: pone.0086033.s004.pdf [file pone.0086033.s004.pdf]

## Data S2

### Candidate reference genes for mRNA normalization

Normfinder version 0.953

<http://moma.dk/normfinder-software>

**liver:** "obesity grouping" obese versus lean mice (independent of treatment)

| Gene name | Stability value | Best gene                                                |                |
|-----------|-----------------|----------------------------------------------------------|----------------|
| 18S       | 0,162           | Stability value                                          | HPRT1<br>0,144 |
| HPRT1     | 0,144           |                                                          |                |
| B2M       | 0,176           | <b>Best combination of two genes</b>                     | 18S and HPRT1  |
| RPIPO     | 0,291           | <b>Stability value for best combination of two genes</b> | 0,087          |
| GAPDH     | 0,491           |                                                          |                |
| ACTB      | 0,424           |                                                          |                |
| HMBS      | 0,339           |                                                          |                |

#### Intragroup variation

| Group identifier | 1     | 2     |
|------------------|-------|-------|
| 18S              | 0,074 | 0,013 |
| HPRT1            | 0,011 | 0,005 |
| B2M              | 0,266 | 0,005 |
| RPIPO            | 0,038 | 0,196 |
| GAPDH            | 0,103 | 1,493 |
| ACTB             | 0,714 | 0,031 |
| HMBS             | 0,255 | 0,346 |

#### Intergroup variation

| Group identifier | 1      | 2      |
|------------------|--------|--------|
| 18S              | 0,059  | -0,059 |
| HPRT1            | -0,095 | 0,095  |
| B2M              | -0,025 | 0,025  |
| RPIPO            | 0,171  | -0,171 |
| GAPDH            | 0,329  | -0,329 |
| ACTB             | -0,298 | 0,298  |
| HMBS             | -0,141 | 0,141  |

**liver:** "treatment grouping" (catechin fed mice versus mice on normal diet)

| Gene name | Stability value | Best gene                                                |                |
|-----------|-----------------|----------------------------------------------------------|----------------|
| 18S       | 0,124           | Stability value                                          | HPRT1<br>0,117 |
| HPRT1     | 0,117           |                                                          |                |
| B2M       | 0,184           | <b>Best combination of two genes</b>                     | 18S and HPRT1  |
| RPIPO     | 0,262           | <b>Stability value for best combination of two genes</b> | 0,086          |
| GAPDH     | 0,511           |                                                          |                |
| ACTB      | 0,363           |                                                          |                |
| HMBS      | 0,314           |                                                          |                |

#### Intragroup variation

| Group identifier | 1     | 2     |
|------------------|-------|-------|
| 18S              | 0,112 | 0,006 |
| HPRT1            | 0,022 | 0,008 |
| B2M              | 0,133 | 0,089 |
| RPIPO            | 0,210 | 0,018 |
| GAPDH            | 0,069 | 1,828 |
| ACTB             | 0,345 | 0,413 |
| HMBS             | 0,115 | 0,558 |

#### Intergroup variation

| Group identifier | 1      | 2      |
|------------------|--------|--------|
| 18S              | 0,019  | -0,019 |
| HPRT1            | -0,053 | 0,053  |
| B2M              | -0,015 | 0,015  |
| RPIPO            | -0,171 | 0,171  |
| GAPDH            | 0,350  | -0,350 |
| ACTB             | -0,254 | 0,254  |
| HMBS             | 0,125  | -0,125 |

**liver:** 4 separate groups

| <u>Gene name</u> | <u>Stability value</u> | <b>Best gene</b>                                         |                |
|------------------|------------------------|----------------------------------------------------------|----------------|
| 18S              | 0,203                  | <b>Stability value</b>                                   | HPRT1<br>0,190 |
| HPRT1            | 0,190                  |                                                          |                |
| B2M              | 0,303                  | <b>Best combination of two genes</b>                     | 18S and HPRT1  |
| RPIP0            | 0,303                  | <b>Stability value for best combination of two genes</b> | 0,145          |
| GAPDH            | 0,505                  |                                                          |                |
| ACTB             | 0,503                  |                                                          |                |
| HMBS             | 0,432                  |                                                          |                |

**Intragroup variation**

| Group identifier | 1     | 2     | 3     | 4     |
|------------------|-------|-------|-------|-------|
| 18S              | 0,119 | 0,130 | 0,035 | 0,005 |
| HPRT1            | 0,022 | 0,042 | 0,023 | 0,003 |
| B2M              | 0,300 | 0,003 | 0,295 | 0,003 |
| RPIP0            | 0,075 | 0,096 | 0,009 | 0,064 |
| GAPDH            | 0,103 | 0,093 | 0,229 | 2,249 |
| ACTB             | 0,344 | 0,031 | 1,508 | 0,002 |
| HMBS             | 0,127 | 0,086 | 0,659 | 0,747 |

**Intergroup variation**

| Group identifier | 1      | 2      | 3      | 4      |
|------------------|--------|--------|--------|--------|
| 18S              | 0,136  | -0,096 | -0,036 | -0,005 |
| HPRT1            | -0,108 | 0,027  | -0,078 | 0,160  |
| B2M              | 0,129  | -0,118 | -0,213 | 0,202  |
| RPIP0            | 0,125  | -0,477 | 0,226  | 0,126  |
| GAPDH            | 0,318  | 0,255  | 0,343  | -0,916 |
| ACTB             | -0,585 | 0,114  | 0,054  | 0,418  |
| HMBS             | -0,015 | 0,295  | -0,295 | 0,015  |

## Candidate reference genes for mRNA normalization

Normfinder version 0.953

<http://moma.dk/normfinder-software>

**small intestine:** "obesity grouping" obese versus lean mice (independent of treatment)

| Gene name | Stability value | Best gene                                                |                |
|-----------|-----------------|----------------------------------------------------------|----------------|
| 18S       | 0,088           | Stability value                                          | HPRT1          |
| HPRT1     | 0,083           |                                                          | 0,083          |
| B2M       | 0,189           | <b>Best combination of two genes</b>                     |                |
| RPIPO     | 0,094           | <b>Stability value for best combination of two genes</b> | RPIPO and HMBS |
| GAPDH     | 0,343           |                                                          | 0,0681         |
| ACTB      | 0,206           |                                                          |                |
| HMBS      | 0,116           |                                                          |                |

### Intragroup variation

| Group identifier | 1     | 2     |
|------------------|-------|-------|
| 18S              | 0,074 | 0,019 |
| HPRT1            | 0,007 | 0,029 |
| B2M              | 0,451 | 0,053 |
| RPIPO            | 0,043 | 0,017 |
| GAPDH            | 0,665 | 0,743 |
| ACTB             | 0,394 | 0,129 |
| HMBS             | 0,099 | 0,030 |

### Intergroup variation

| Group identifier | 1      | 2      |
|------------------|--------|--------|
| 18S              | 0,006  | -0,006 |
| HPRT1            | -0,114 | 0,114  |
| B2M              | -0,060 | 0,060  |
| RPIPO            | -0,159 | 0,159  |
| GAPDH            | -0,014 | 0,014  |
| ACTB             | 0,171  | -0,171 |
| HMBS             | 0,170  | -0,170 |

**small intestine:** "treatment grouping" (catechin fed mice versus mice on normal diet)

| Gene name | Stability value | Best gene                                                |              |
|-----------|-----------------|----------------------------------------------------------|--------------|
| 18S       | 0,127           | Stability value                                          | 18S          |
| HPRT1     | 0,147           |                                                          | 0,127        |
| B2M       | 0,253           | <b>Best combination of two genes</b>                     |              |
| RPIPO     | 0,161           | <b>Stability value for best combination of two genes</b> | 18S and HMBS |
| GAPDH     | 0,362           |                                                          | 0,120        |
| ACTB      | 0,289           |                                                          |              |
| HMBS      | 0,168           |                                                          |              |

### Intragroup variation

| Group identifier | 1     | 2     |
|------------------|-------|-------|
| 18S              | 0,004 | 0,083 |
| HPRT1            | 0,074 | 0,022 |
| B2M              | 0,184 | 0,252 |
| RPIPO            | 0,038 | 0,097 |
| GAPDH            | 0,496 | 0,772 |
| ACTB             | 0,003 | 0,435 |
| HMBS             | 0,103 | 0,126 |

### Intergroup variation

| Group identifier | 1      | 2      |
|------------------|--------|--------|
| 18S              | 0,053  | -0,053 |
| HPRT1            | 0,061  | -0,061 |
| B2M              | -0,158 | 0,158  |
| RPIPO            | 0,061  | -0,061 |
| GAPDH            | 0,206  | -0,206 |
| ACTB             | -0,235 | 0,235  |
| HMBS             | 0,012  | -0,012 |

**small intestine:** 4 separate groups

| Gene name | Stability value | Best gene<br>Stability value                                                               |                          |
|-----------|-----------------|--------------------------------------------------------------------------------------------|--------------------------|
| 18S       | 0,109           |                                                                                            | HPRT1<br>0,092           |
| HPRT1     | 0,092           |                                                                                            |                          |
| B2M       | 0,258           | <b>Best combination of two genes<br/>Stability value for best combination of two genes</b> | HPRT1 and RPIP0<br>0,069 |
| RPIP0     | 0,098           |                                                                                            |                          |
| GAPDH     | 0,468           |                                                                                            |                          |
| ACTB      | 0,198           |                                                                                            |                          |
| HMBS      | 0,152           |                                                                                            |                          |

**Intragroup variation**

| Group identifier | 1     | 2     | 3     | 4     |
|------------------|-------|-------|-------|-------|
| 18S              | 0,004 | 0,026 | 0,222 | 0,003 |
| HPRT1            | 0,069 | 0,003 | 0,024 | 0,026 |
| B2M              | 0,414 | 0,020 | 0,583 | 0,059 |
| RPIP0            | 0,036 | 0,032 | 0,031 | 0,018 |
| GAPDH            | 0,068 | 1,137 | 1,170 | 0,698 |
| ACTB             | 0,002 | 0,003 | 0,614 | 0,240 |
| HMBS             | 0,033 | 0,039 | 0,226 | 0,039 |

**Intergroup variation**

| Group identifier | 1      | 2      | 3      | 4      |
|------------------|--------|--------|--------|--------|
| 18S              | 0,012  | 0,093  | -0,001 | -0,104 |
| HPRT1            | -0,132 | 0,254  | -0,096 | -0,027 |
| B2M              | -0,253 | -0,062 | 0,132  | 0,183  |
| RPIP0            | -0,034 | 0,157  | -0,284 | 0,161  |
| GAPDH            | 0,314  | 0,098  | -0,341 | -0,071 |
| ACTB             | -0,137 | -0,334 | 0,478  | -0,007 |
| HMBS             | 0,229  | -0,206 | 0,112  | -0,135 |
