# Supplementary material for: Reference Genes for Real-Time PCR Quantification of Messenger RNAs and MicroRNAs in Mouse Model of Obesity
Source: PubMed Central journal article supplement (PMC3895018; doi:10.1371/journal.pone.0086033), 2014-01-17
Supplement: pone.0086033.s005.pdf [file pone.0086033.s005.pdf]

## Data S3

### Candidate reference genes for mRNA normalization

BestKeeper version 1

<http://gene-quantification.com/bestkeeper.html>

**liver**

#### CP data of housekeeping Genes:

|                         | <b>HPRT1</b> | <b>B2M</b> | <b>18S</b> | <b>RPIPO</b> | <b>GAPDH</b> | <b>ACTB</b> | <b>HMBS</b> |
|-------------------------|--------------|------------|------------|--------------|--------------|-------------|-------------|
|                         | HKG 1        | HKG 2      | HKG 3      | HKG 4        | HKG 5        | HKG 6       | HKG 7       |
| n                       | 11           | 11         | 11         | 11           | 11           | 11          | 11          |
| geo Mean [CP]           | 21,46        | 14,15      | 23,68      | 18,44        | 17,86        | 18,88       | 23,34       |
| ar Mean [CP]            | 21,47        | 14,16      | 23,69      | 18,45        | 17,88        | 18,92       | 23,36       |
| min [CP]                | 20,68        | 13,19      | 22,77      | 17,17        | 16,74        | 17,15       | 22,04       |
| max [CP]                | 22,46        | 14,79      | 25,12      | 19,62        | 20,51        | 21,67       | 25,16       |
| std dev [ $\pm$ CP]     | 0,39         | 0,38       | 0,55       | 0,53         | 0,71         | 0,96        | 0,82        |
| CV [% CP]               | 1,82         | 2,71       | 2,32       | 2,89         | 3,97         | 5,09        | 3,51        |
| min [x-fold]            | -1,67        | -1,99      | -1,86      | -2,35        | -2,17        | -3,14       | -2,34       |
| max [x-fold]            | 1,93         | 1,58       | 2,71       | 2,21         | 6,27         | 6,34        | 3,27        |
| std dev [ $\pm$ x-fold] | 1,29         | 1,29       | 1,43       | 1,42         | 1,60         | 1,88        | 1,71        |

#### Pearson correlation coefficient ( r )

| vs.                        | HKG 1         | HKG 2         | HKG 3         | HKG 4         | HKG 5         | HKG 6        | HKG 7        |
|----------------------------|---------------|---------------|---------------|---------------|---------------|--------------|--------------|
| <b>HKG 2</b>               | <b>0,761</b>  | -             | -             | -             | -             | -            | -            |
| <b>p-value</b>             | <b>0,007</b>  | -             | -             | -             | -             | -            | -            |
| <b>HKG 3</b>               | <b>0,673</b>  | <b>0,537</b>  | -             | -             | -             | -            | -            |
| <b>p-value</b>             | <b>0,023</b>  | <b>0,088</b>  | -             | -             | -             | -            | -            |
| <b>HKG 4</b>               | <b>0,512</b>  | <b>0,610</b>  | <b>0,636</b>  | -             | -             | -            | -            |
| <b>p-value</b>             | <b>0,107</b>  | <b>0,046</b>  | <b>0,036</b>  | -             | -             | -            | -            |
| <b>HKG 5</b>               | <b>-0,294</b> | <b>-0,476</b> | <b>-0,081</b> | <b>-0,367</b> | -             | -            | -            |
| <b>p-value</b>             | <b>0,382</b>  | <b>0,140</b>  | <b>0,816</b>  | <b>0,268</b>  | -             | -            | -            |
| <b>HKG 6</b>               | <b>0,857</b>  | <b>0,461</b>  | <b>0,688</b>  | <b>0,528</b>  | <b>-0,189</b> | -            | -            |
| <b>p-value</b>             | <b>0,001</b>  | <b>0,153</b>  | <b>0,019</b>  | <b>0,094</b>  | <b>0,576</b>  | -            | -            |
| <b>HKG 7</b>               | <b>0,608</b>  | <b>0,338</b>  | <b>0,670</b>  | <b>0,317</b>  | <b>-0,428</b> | <b>0,774</b> | -            |
| <b>p-value</b>             | <b>0,047</b>  | <b>0,308</b>  | <b>0,024</b>  | <b>0,343</b>  | <b>0,189</b>  | <b>0,005</b> | -            |
| <b>BestKeeper vs.</b>      | <b>HKG 1</b>  | <b>HKG 2</b>  | <b>HKG 3</b>  | <b>HKG 4</b>  | <b>HKG 5</b>  | <b>HKG 6</b> | <b>HKG 7</b> |
| <b>coeff. of corr. [r]</b> | <b>0,870</b>  | <b>0,617</b>  | <b>0,878</b>  | <b>0,660</b>  | <b>-0,092</b> | <b>0,923</b> | <b>0,717</b> |
| <b>p-value</b>             | <b>0,001</b>  | <b>0,043</b>  | <b>0,001</b>  | <b>0,027</b>  | <b>0,786</b>  | <b>0,001</b> | <b>0,013</b> |

#### Regression Analysis: HKG vs. BestKeeper

|                                  | <b>HPRT1</b> | <b>B2M</b>   | <b>18S</b>   | <b>RPIPO</b> | <b>GAPDH</b> | <b>ACTB</b>   | <b>HMBS</b>  |
|----------------------------------|--------------|--------------|--------------|--------------|--------------|---------------|--------------|
|                                  | HKG 1        | HKG 2        | HKG 3        | HKG 4        | HKG 5        | HKG 6         | HKG 7        |
|                                  | vs.          | vs.          | vs.          | vs.          | vs.          | vs.           | vs.          |
|                                  | BK           | BK           | BK           | BK           | BK           | BK            | BK           |
| coeff. of corr. [r]              | <b>0,87</b>  | <b>0,62</b>  | <b>0,88</b>  | <b>0,66</b>  | <b>-0,09</b> | <b>0,92</b>   | <b>0,72</b>  |
| coeff. of det. [r <sup>2</sup> ] | <b>0,76</b>  | <b>0,38</b>  | <b>0,77</b>  | <b>0,44</b>  | <b>0,01</b>  | <b>0,85</b>   | <b>0,51</b>  |
| intercept [CP]                   | <b>4,46</b>  | <b>2,70</b>  | <b>-0,60</b> | <b>0,95</b>  | <b>21,49</b> | <b>-26,89</b> | <b>-4,44</b> |
| slope [CP]                       | <b>0,88</b>  | <b>0,59</b>  | <b>1,25</b>  | <b>0,90</b>  | <b>-0,19</b> | <b>2,36</b>   | <b>1,43</b>  |
| SE [CP]                          | $\pm 0,27$   | $\pm 0,41$   | $\pm 0,371$  | $\pm 0,558$  | $\pm 1,098$  | $\pm 0,535$   | $\pm 0,758$  |
| p-value                          | <b>0,001</b> | <b>0,043</b> | <b>0,001</b> | <b>0,027</b> | <b>0,786</b> | <b>0,001</b>  | <b>0,013</b> |
| Power of HKG [x-fold]            | <b>1,78</b>  | <b>1,53</b>  | <b>2,36</b>  | <b>1,83</b>  | <b>0,88</b>  | <b>4,77</b>   | <b>2,54</b>  |

small intestine

**CP data of housekeeping Genes:**

|                         | HPRT1 | B2M   | 18S   | RPIPO | GAPDH | ACTB  | HMBS  |
|-------------------------|-------|-------|-------|-------|-------|-------|-------|
|                         | HKG 1 | HKG 2 | HKG 3 | HKG 4 | HKG 5 | HKG 6 | HKG 7 |
| n                       | 12    | 12    | 12    | 12    | 12    | 12    | 12    |
| geo Mean [CP]           | 25,41 | 16,59 | 20,03 | 19,06 | 21,25 | 21,48 | 29,66 |
| ar Mean [CP]            | 25,42 | 16,64 | 20,05 | 19,07 | 21,29 | 21,53 | 29,69 |
| min [CP]                | 23,73 | 14,02 | 18,86 | 18,14 | 18,85 | 18,22 | 27,24 |
| max [CP]                | 26,75 | 18,58 | 21,52 | 20,42 | 23,89 | 23,60 | 31,44 |
| std dev [ $\pm$ CP]     | 0,82  | 1,00  | 0,72  | 0,59  | 1,10  | 1,14  | 0,97  |
| CV [% CP]               | 3,22  | 6,01  | 3,60  | 3,10  | 5,15  | 5,29  | 3,25  |
| min [x-fold]            | -3,01 | -6,37 | -2,24 | -1,86 | -5,29 | -8,68 | -4,85 |
| max [x-fold]            | 2,41  | 4,16  | 2,79  | 2,50  | 6,24  | 4,09  | 3,18  |
| std dev [ $\pm$ x-fold] | 1,71  | 1,93  | 1,61  | 1,47  | 2,06  | 2,12  | 1,89  |

**Pearson correlation coefficient ( r )**

| vs.                        | HKG 1        | HKG 2        | HKG 3        | HKG 4        | HKG 5        | HKG 6        | HKG 7        |
|----------------------------|--------------|--------------|--------------|--------------|--------------|--------------|--------------|
| HKG 2                      | 0,759        | -            | -            | -            | -            | -            | -            |
| p-value                    | 0,004        | -            | -            | -            | -            | -            | -            |
| HKG 3                      | 0,896        | 0,845        | -            | -            | -            | -            | -            |
| p-value                    | 0,001        | 0,001        | -            | -            | -            | -            | -            |
| HKG 4                      | 0,911        | 0,872        | 0,921        | -            | -            | -            | -            |
| p-value                    | 0,001        | 0,001        | 0,001        | -            | -            | -            | -            |
| HKG 5                      | 0,682        | 0,390        | 0,553        | 0,642        | -            | -            | -            |
| p-value                    | 0,015        | 0,210        | 0,062        | 0,024        | -            | -            | -            |
| HKG 6                      | 0,849        | 0,903        | 0,896        | 0,876        | 0,419        | -            | -            |
| p-value                    | 0,001        | 0,001        | 0,001        | 0,001        | 0,175        | -            | -            |
| HKG 7                      | 0,891        | 0,741        | 0,873        | 0,865        | 0,670        | 0,859        | -            |
| p-value                    | 0,001        | 0,006        | 0,001        | 0,001        | 0,017        | 0,001        | -            |
| <b>BestKeeper vs.</b>      | <b>HKG 1</b> | <b>HKG 2</b> | <b>HKG 3</b> | <b>HKG 4</b> | <b>HKG 5</b> | <b>HKG 6</b> | <b>HKG 7</b> |
| <b>coeff. of corr. [r]</b> | <b>0,940</b> | <b>0,894</b> | <b>0,946</b> | <b>0,964</b> | <b>0,682</b> | <b>0,931</b> | <b>0,928</b> |
| <b>p-value</b>             | <b>0,001</b> | <b>0,001</b> | <b>0,001</b> | <b>0,001</b> | <b>0,015</b> | <b>0,001</b> | <b>0,001</b> |

**Regression Analysis: HKG vs. BestKeeper**

|                                  | HPRT1       | B2M         | 18S         | RPIPO       | GAPDH       | ACTB        | HMBS       |
|----------------------------------|-------------|-------------|-------------|-------------|-------------|-------------|------------|
|                                  | HKG 1       | HKG 2       | HKG 3       | HKG 4       | HKG 5       | HKG 6       | HKG 7      |
|                                  | vs.         | vs.         | vs.         | vs.         | vs.         | vs.         | vs.        |
|                                  | BK          | BK          | BK          | BK          | BK          | BK          | BK         |
| coeff. of corr. [r]              | 0,94        | 0,89        | 0,95        | 0,96        | 0,68        | 0,93        | 0,93       |
| coeff. of det. [r <sup>2</sup> ] | 0,88        | 0,80        | 0,90        | 0,93        | 0,47        | 0,87        | 0,86       |
| intercept [CP]                   | 6,44        | -7,54       | 2,19        | 4,70        | 1,25        | -7,86       | 5,33       |
| slope [CP]                       | 0,88        | 1,12        | 0,83        | 0,67        | 0,93        | 1,36        | 1,13       |
| SE [CP]                          | $\pm 0,344$ | $\pm 0,607$ | $\pm 0,306$ | $\pm 0,199$ | $\pm 1,076$ | $\pm 0,576$ | $\pm 0,49$ |
| p-value                          | 0,001       | 0,001       | 0,001       | 0,001       | 0,015       | 0,001       | 0,001      |
| Power of HKG [x-fold]            | 1,78        | 2,23        | 1,77        | 1,56        | 1,90        | 2,46        | 2,09       |

## Candidate reference genes for miRNA normalization

BestKeeper version 1

<http://gene-quantification.com/bestkeeper.html>

**liver**

### CP data of housekeeping Genes:

|                         | mir186 | mir142 | U6    | sno202 | miR16 | mir122 | sno234 | mir143 | mir19a | mir200a |
|-------------------------|--------|--------|-------|--------|-------|--------|--------|--------|--------|---------|
|                         | HKG 1  | HKG 2  | HKG 3 | HKG 4  | HKG 5 | HKG 6  | HKG 7  | HKG 8  | HKG 9  | HKG 10  |
| n                       | 12     | 12     | 12    | 12     | 12    | 12     | 12     | 12     | 12     | 12      |
| geo Mean [CP]           | 26,03  | 31,28  | 16,37 | 23,35  | 23,03 | 18,56  | 16,64  | 21,80  | 25,23  | 25,64   |
| ar Mean [CP]            | 26,03  | 31,28  | 16,38 | 23,35  | 23,03 | 18,56  | 16,64  | 21,80  | 25,23  | 25,65   |
| min [CP]                | 25,64  | 30,40  | 15,15 | 22,68  | 22,56 | 17,97  | 16,13  | 21,23  | 24,66  | 24,21   |
| max [CP]                | 26,49  | 32,55  | 17,14 | 24,25  | 23,40 | 19,03  | 17,20  | 22,46  | 25,86  | 26,62   |
| std dev [ $\pm$ CP]     | 0,28   | 0,54   | 0,41  | 0,49   | 0,18  | 0,34   | 0,24   | 0,34   | 0,31   | 0,62    |
| CV [% CP]               | 1,06   | 1,73   | 2,50  | 2,10   | 0,80  | 1,85   | 1,46   | 1,56   | 1,22   | 2,41    |
| min [x-fold]            | -1,31  | -1,83  | -2,34 | -1,59  | -1,39 | -1,50  | -1,42  | -1,49  | -1,48  | -2,69   |
| max [x-fold]            | 1,38   | 2,42   | 1,70  | 1,87   | 1,29  | 1,39   | 1,48   | 1,57   | 1,55   | 1,97    |
| std dev [ $\pm$ x-fold] | 1,21   | 1,46   | 1,33  | 1,41   | 1,14  | 1,27   | 1,18   | 1,27   | 1,24   | 1,53    |

### Pearson correlation coefficient ( r )

| vs.                        | HKG 1        | HKG 2        | HKG 3        | HKG 4         | HKG 5        | HKG 6        | HKG 7        | HKG 8        | HKG 9        | HKG 10        |
|----------------------------|--------------|--------------|--------------|---------------|--------------|--------------|--------------|--------------|--------------|---------------|
| HKG 2                      | 0,338        | -            | -            | -             | -            | -            | -            | -            | -            | -             |
| p-value                    | 0,281        | -            | -            | -             | -            | -            | -            | -            | -            | -             |
| HKG 3                      | 0,154        | 0,717        | -            | -             | -            | -            | -            | -            | -            | -             |
| p-value                    | 0,635        | 0,009        | -            | -             | -            | -            | -            | -            | -            | -             |
| HKG 4                      | 0,020        | -0,335       | -0,534       | -             | -            | -            | -            | -            | -            | -             |
| p-value                    | 0,953        | 0,289        | 0,073        | -             | -            | -            | -            | -            | -            | -             |
| HKG 5                      | -0,071       | 0,025        | -0,307       | 0,676         | -            | -            | -            | -            | -            | -             |
| p-value                    | 0,823        | 0,938        | 0,332        | 0,016         | -            | -            | -            | -            | -            | -             |
| HKG 6                      | 0,042        | 0,653        | 0,619        | -0,349        | -0,200       | -            | -            | -            | -            | -             |
| p-value                    | 0,899        | 0,021        | 0,032        | 0,265         | 0,530        | -            | -            | -            | -            | -             |
| HKG 7                      | 0,183        | -0,367       | -0,204       | 0,736         | 0,381        | -0,190       | -            | -            | -            | -             |
| p-value                    | 0,568        | 0,240        | 0,524        | 0,006         | 0,223        | 0,555        | -            | -            | -            | -             |
| HKG 8                      | 0,394        | 0,707        | 0,399        | -0,227        | 0,095        | 0,383        | -0,372       | -            | -            | -             |
| p-value                    | 0,204        | 0,010        | 0,198        | 0,476         | 0,770        | 0,219        | 0,233        | -            | -            | -             |
| HKG 9                      | -0,308       | 0,136        | 0,132        | 0,429         | 0,404        | 0,160        | 0,066        | 0,292        | -            | -             |
| p-value                    | 0,332        | 0,676        | 0,683        | 0,165         | 0,192        | 0,621        | 0,838        | 0,355        | -            | -             |
| HKG 10                     | 0,025        | 0,584        | 0,552        | -0,681        | -0,356       | 0,777        | -0,352       | 0,260        | -0,381       | -             |
| p-value                    | 0,938        | 0,047        | 0,063        | 0,015         | 0,258        | 0,003        | 0,262        | 0,415        | 0,223        | -             |
| <b>BestKeeper vs.</b>      | <b>HKG 1</b> | <b>HKG 2</b> | <b>HKG 3</b> | <b>HKG 4</b>  | <b>HKG 5</b> | <b>HKG 6</b> | <b>HKG 7</b> | <b>HKG 8</b> | <b>HKG 9</b> | <b>HKG 10</b> |
| <b>coeff. of corr. [r]</b> | <b>0,331</b> | <b>0,844</b> | <b>0,731</b> | <b>-0,067</b> | <b>0,158</b> | <b>0,781</b> | <b>0,071</b> | <b>0,629</b> | <b>0,326</b> | <b>0,525</b>  |
| <b>p-value</b>             | <b>0,293</b> | <b>0,001</b> | <b>0,007</b> | <b>0,838</b>  | <b>0,621</b> | <b>0,003</b> | <b>0,823</b> | <b>0,028</b> | <b>0,301</b> | <b>0,080</b>  |

### Regression Analysis: HKG vs. BestKeeper

|                                  | mir186      | mir142      | U6          | sno202      | miR16       | mir122      | sno234      | mir143      | mir19a      | mir200a     |
|----------------------------------|-------------|-------------|-------------|-------------|-------------|-------------|-------------|-------------|-------------|-------------|
|                                  | HKG 1       | HKG 2       | HKG 3       | HKG 4       | HKG 5       | HKG 6       | HKG 7       | HKG 8       | HKG 9       | HKG 10      |
|                                  | vs.         | vs.         | vs.         | vs.         | vs.         | vs.         | vs.         | vs.         | vs.         | vs.         |
|                                  | BK          | BK          | BK          | BK          | BK          | BK          | BK          | BK          | BK          | BK          |
| coeff. of corr. [r]              | 0,33        | 0,84        | 0,73        | -0,07       | 0,16        | 0,78        | 0,07        | 0,63        | 0,33        | 0,53        |
| coeff. of det. [r <sup>2</sup> ] | 0,11        | 0,71        | 0,53        | 0,00        | 0,03        | 0,61        | 0,01        | 0,40        | 0,11        | 0,28        |
| intercept [CP]                   | 15,27       | -27,57      | -25,34      | 27,15       | 19,27       | -12,24      | 14,36       | -4,31       | 12,32       | -15,81      |
| slope [CP]                       | 0,48        | 2,63        | 1,87        | -0,17       | 0,17        | 1,38        | 0,10        | 1,17        | 0,58        | 1,85        |
| SE [CP]                          | $\pm 0,315$ | $\pm 0,385$ | $\pm 0,401$ | $\pm 0,583$ | $\pm 0,241$ | $\pm 0,254$ | $\pm 0,331$ | $\pm 0,332$ | $\pm 0,385$ | $\pm 0,693$ |
| p-value                          | 0,293       | 0,001       | 0,007       | 0,838       | 0,621       | 0,003       | 0,823       | 0,028       | 0,301       | 0,080       |
| Power of HKG [x-fold]            | 1,40        | 6,20        | 3,65        | 0,89        | 1,12        | 2,60        | 1,07        | 2,25        | 1,49        | 3,62        |

small intestine

CP data of housekeeping Genes:

|                         | mir186 | mir142 | U6    | sno202 | miR16 | mir122 | sno234 | mir143 | mir19a | mir200a |
|-------------------------|--------|--------|-------|--------|-------|--------|--------|--------|--------|---------|
|                         | HKG 1  | HKG 2  | HKG 3 | HKG 4  | HKG 5 | HKG 6  | HKG 7  | HKG 8  | HKG 9  | HKG 10  |
| n                       | 12     | 12     | 12    | 12     | 12    | 12     | 12     | 12     | 12     | 12      |
| geo Mean [CP]           | 24,15  | 29,48  | 15,97 | 17,88  | 19,77 | 28,82  | 16,71  | 17,31  | 23,41  | 19,31   |
| ar Mean [CP]            | 24,16  | 29,50  | 15,98 | 17,88  | 19,79 | 28,90  | 16,72  | 17,34  | 23,41  | 19,32   |
| min [CP]                | 22,73  | 27,85  | 15,19 | 17,47  | 18,60 | 24,16  | 16,10  | 15,03  | 22,51  | 18,33   |
| max [CP]                | 25,09  | 31,52  | 17,15 | 18,58  | 21,46 | 32,95  | 17,65  | 18,38  | 24,75  | 20,27   |
| std dev [ $\pm$ CP]     | 0,44   | 0,84   | 0,44  | 0,34   | 0,69  | 1,55   | 0,32   | 0,65   | 0,51   | 0,44    |
| CV [% CP]               | 1,82   | 2,85   | 2,72  | 1,91   | 3,48  | 5,35   | 1,88   | 3,75   | 2,17   | 2,28    |
| min [x-fold]            | -2,67  | -3,11  | -1,72 | -1,33  | -2,25 | -25,26 | -1,53  | -4,87  | -1,86  | -1,97   |
| max [x-fold]            | 1,92   | 4,10   | 2,27  | 1,62   | 3,21  | 17,46  | 1,92   | 2,09   | 2,54   | 1,94    |
| std dev [ $\pm$ x-fold] | 1,36   | 1,79   | 1,35  | 1,27   | 1,61  | 2,92   | 1,24   | 1,57   | 1,42   | 1,36    |

Pearson correlation coefficient ( r )

| vs.                                       | HKG 1        | HKG 2        | HKG 3        | HKG 4        | HKG 5        | HKG 6        | HKG 7        | HKG 8        | HKG 9        | HKG 10       |
|-------------------------------------------|--------------|--------------|--------------|--------------|--------------|--------------|--------------|--------------|--------------|--------------|
| HKG 2                                     | 0,726        | -            | -            | -            | -            | -            | -            | -            | -            | -            |
| p-value                                   | 0,007        | -            | -            | -            | -            | -            | -            | -            | -            | -            |
| HKG 3                                     | -0,396       | -0,124       | -            | -            | -            | -            | -            | -            | -            | -            |
| p-value                                   | 0,204        | 0,698        | -            | -            | -            | -            | -            | -            | -            | -            |
| HKG 4                                     | -0,173       | 0,073        | 0,767        | -            | -            | -            | -            | -            | -            | -            |
| p-value                                   | 0,588        | 0,823        | 0,004        | -            | -            | -            | -            | -            | -            | -            |
| HKG 5                                     | 0,165        | 0,307        | 0,646        | 0,664        | -            | -            | -            | -            | -            | -            |
| p-value                                   | 0,608        | 0,332        | 0,023        | 0,018        | -            | -            | -            | -            | -            | -            |
| HKG 6                                     | -0,213       | -0,098       | 0,216        | 0,002        | -0,373       | -            | -            | -            | -            | -            |
| p-value                                   | 0,506        | 0,763        | 0,500        | 0,992        | 0,233        | -            | -            | -            | -            | -            |
| HKG 7                                     | 0,822        | 0,852        | -0,307       | -0,159       | 0,245        | -0,343       | -            | -            | -            | -            |
| p-value                                   | 0,001        | 0,001        | 0,332        | 0,621        | 0,442        | 0,277        | -            | -            | -            | -            |
| HKG 8                                     | 0,911        | 0,607        | -0,497       | -0,329       | -0,050       | 0,013        | 0,674        | -            | -            | -            |
| p-value                                   | 0,001        | 0,037        | 0,100        | 0,297        | 0,876        | 0,969        | 0,016        | -            | -            | -            |
| HKG 9                                     | 0,764        | 0,690        | -0,396       | -0,272       | 0,063        | -0,286       | 0,785        | 0,608        | -            | -            |
| p-value                                   | 0,004        | 0,013        | 0,204        | 0,394        | 0,845        | 0,369        | 0,002        | 0,036        | -            | -            |
| HKG 10                                    | 0,848        | 0,638        | -0,340       | -0,225       | 0,114        | -0,071       | 0,692        | 0,826        | 0,759        | -            |
| p-value                                   | 0,001        | 0,026        | 0,281        | 0,482        | 0,726        | 0,823        | 0,013        | 0,001        | 0,004        | -            |
| <b>BestKeeper vs. coeff. of corr. [r]</b> | <b>0,761</b> | <b>0,802</b> | <b>0,139</b> | <b>0,220</b> | <b>0,401</b> | <b>0,227</b> | <b>0,669</b> | <b>0,711</b> | <b>0,569</b> | <b>0,750</b> |
| <b>p-value</b>                            | <b>0,004</b> | <b>0,002</b> | <b>0,669</b> | <b>0,494</b> | <b>0,198</b> | <b>0,476</b> | <b>0,017</b> | <b>0,009</b> | <b>0,053</b> | <b>0,005</b> |

Regression Analysis: HKG vs. BestKeeper

|                                  | mir186      | mir142     | U6         | sno202      | miR16       | mir122      | sno234      | mir143      | mir19a      | mir200a     |
|----------------------------------|-------------|------------|------------|-------------|-------------|-------------|-------------|-------------|-------------|-------------|
|                                  | HKG 1       | HKG 2      | HKG 3      | HKG 4       | HKG 5       | HKG 6       | HKG 7       | HKG 8       | HKG 9       | HKG 10      |
| vs.                              | vs.         | vs.        | vs.        | vs.         | vs.         | vs.         | vs.         | vs.         | vs.         | vs.         |
|                                  | BK          | BK         | BK         | BK          | BK          | BK          | BK          | BK          | BK          | BK          |
| coeff. of corr. [r]              | 0,76        | 0,80       | 0,14       | 0,22        | 0,40        | 0,23        | 0,67        | 0,71        | 0,57        | 0,75        |
| coeff. of det. [r <sup>2</sup> ] | 0,58        | 0,64       | 0,02       | 0,05        | 0,16        | 0,05        | 0,45        | 0,51        | 0,32        | 0,56        |
| intercept [CP]                   | -1,16       | -17,29     | 11,73      | 13,07       | 0,85        | 2,22        | 1,34        | -17,21      | 3,39        | -4,69       |
| slope [CP]                       | 1,22        | 2,25       | 0,20       | 0,23        | 0,91        | 1,28        | 0,74        | 1,66        | 0,96        | 1,15        |
| SE [CP]                          | $\pm 0,421$ | $\pm 0,68$ | $\pm 0,59$ | $\pm 0,416$ | $\pm 0,845$ | $\pm 2,231$ | $\pm 0,333$ | $\pm 0,666$ | $\pm 0,564$ | $\pm 0,413$ |
| p-value                          | 0,004       | 0,002      | 0,669      | 0,494       | 0,198       | 0,476       | 0,017       | 0,009       | 0,053       | 0,005       |
| Power of HKG [x-fold]            | 2,32        | 4,75       | 1,15       | 1,17        | 1,88        | 2,43        | 1,67        | 3,16        | 1,95        | 2,23        |
